# Supplementary material for: Heat shock factor 1 is a potent therapeutic target for enhancing the efficacy of treatments for multiple myeloma with adverse prognosis
Source: Springer Nature journal article supplement (doi:10.1186/s13045-015-0135-3), 2015-04-22
Supplement: MOESM3 [file 9777430]

A

8226

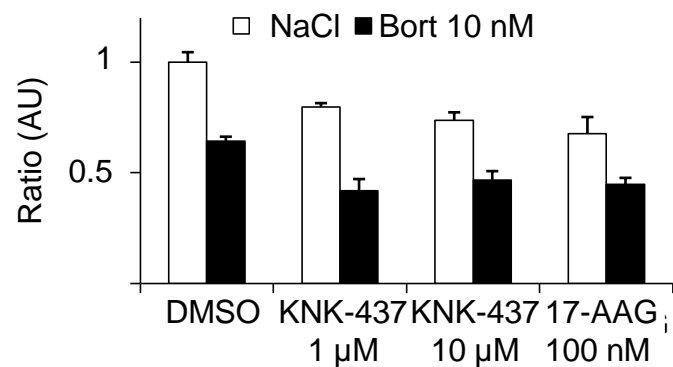

L363

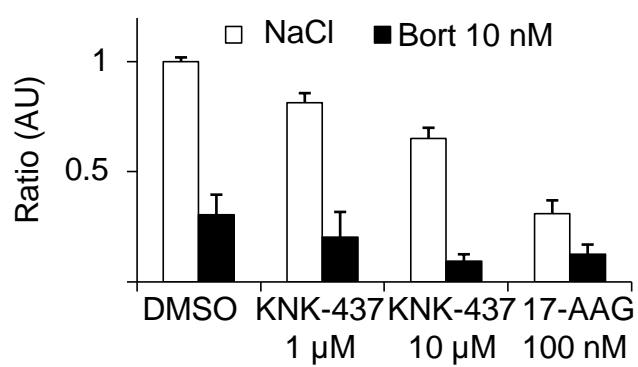

LP1

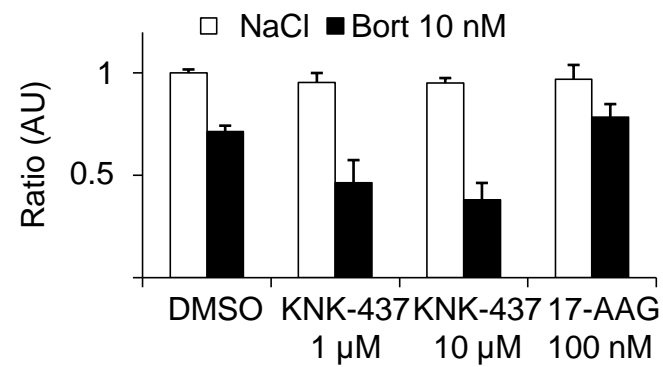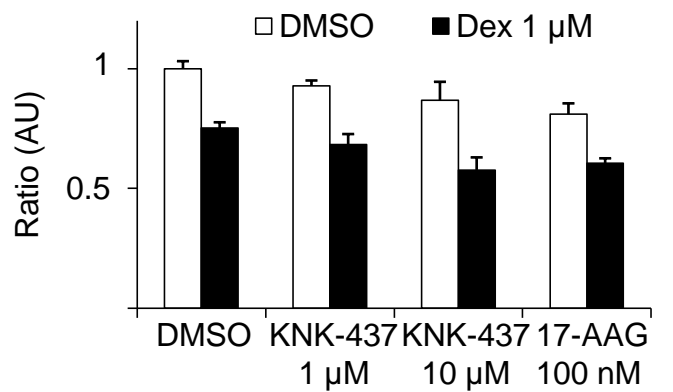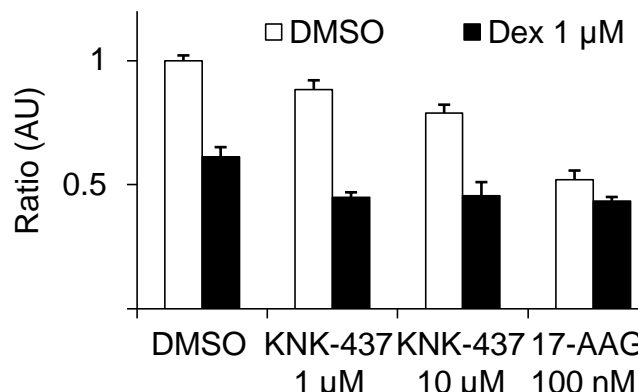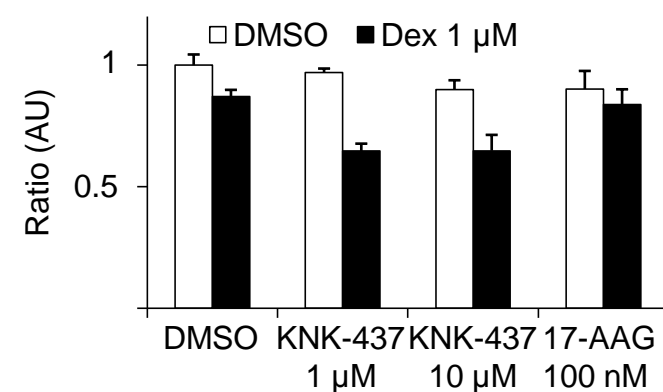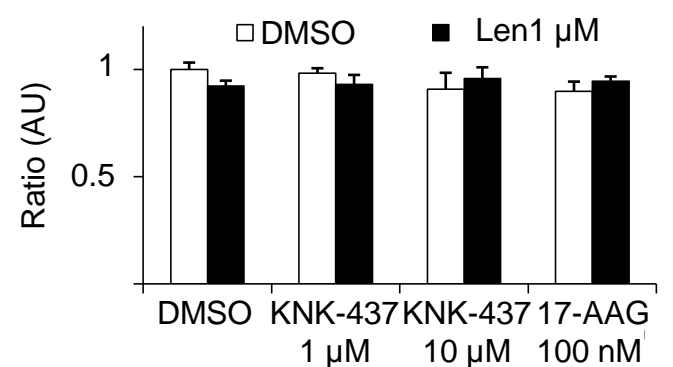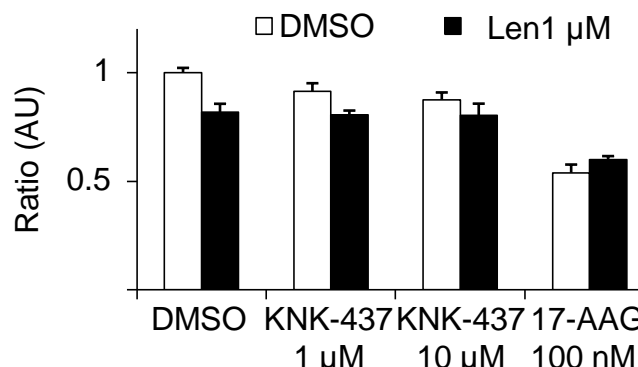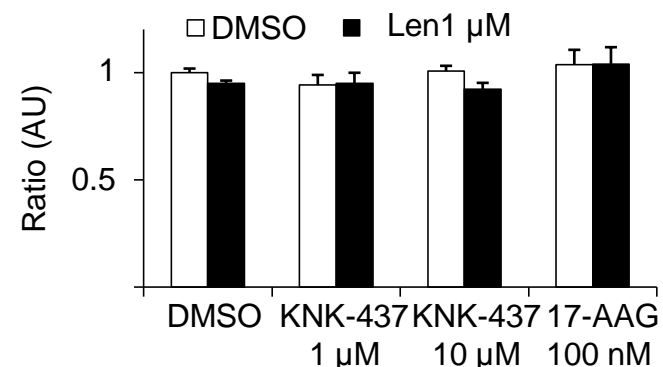

Supplementary Figure 1
